# Supplementary material for: Alien Hand, Restless Brain: Salience Network and Interhemispheric Connectivity Disruption Parallel Emergence and Extinction of Diagonistic Dyspraxia
Source: PubMed Central journal article supplement (PMC4913492; doi:10.3389/fnhum.2016.00307), 2016-06-20
Supplement: Image_2.pdf [file Image_2.pdf]

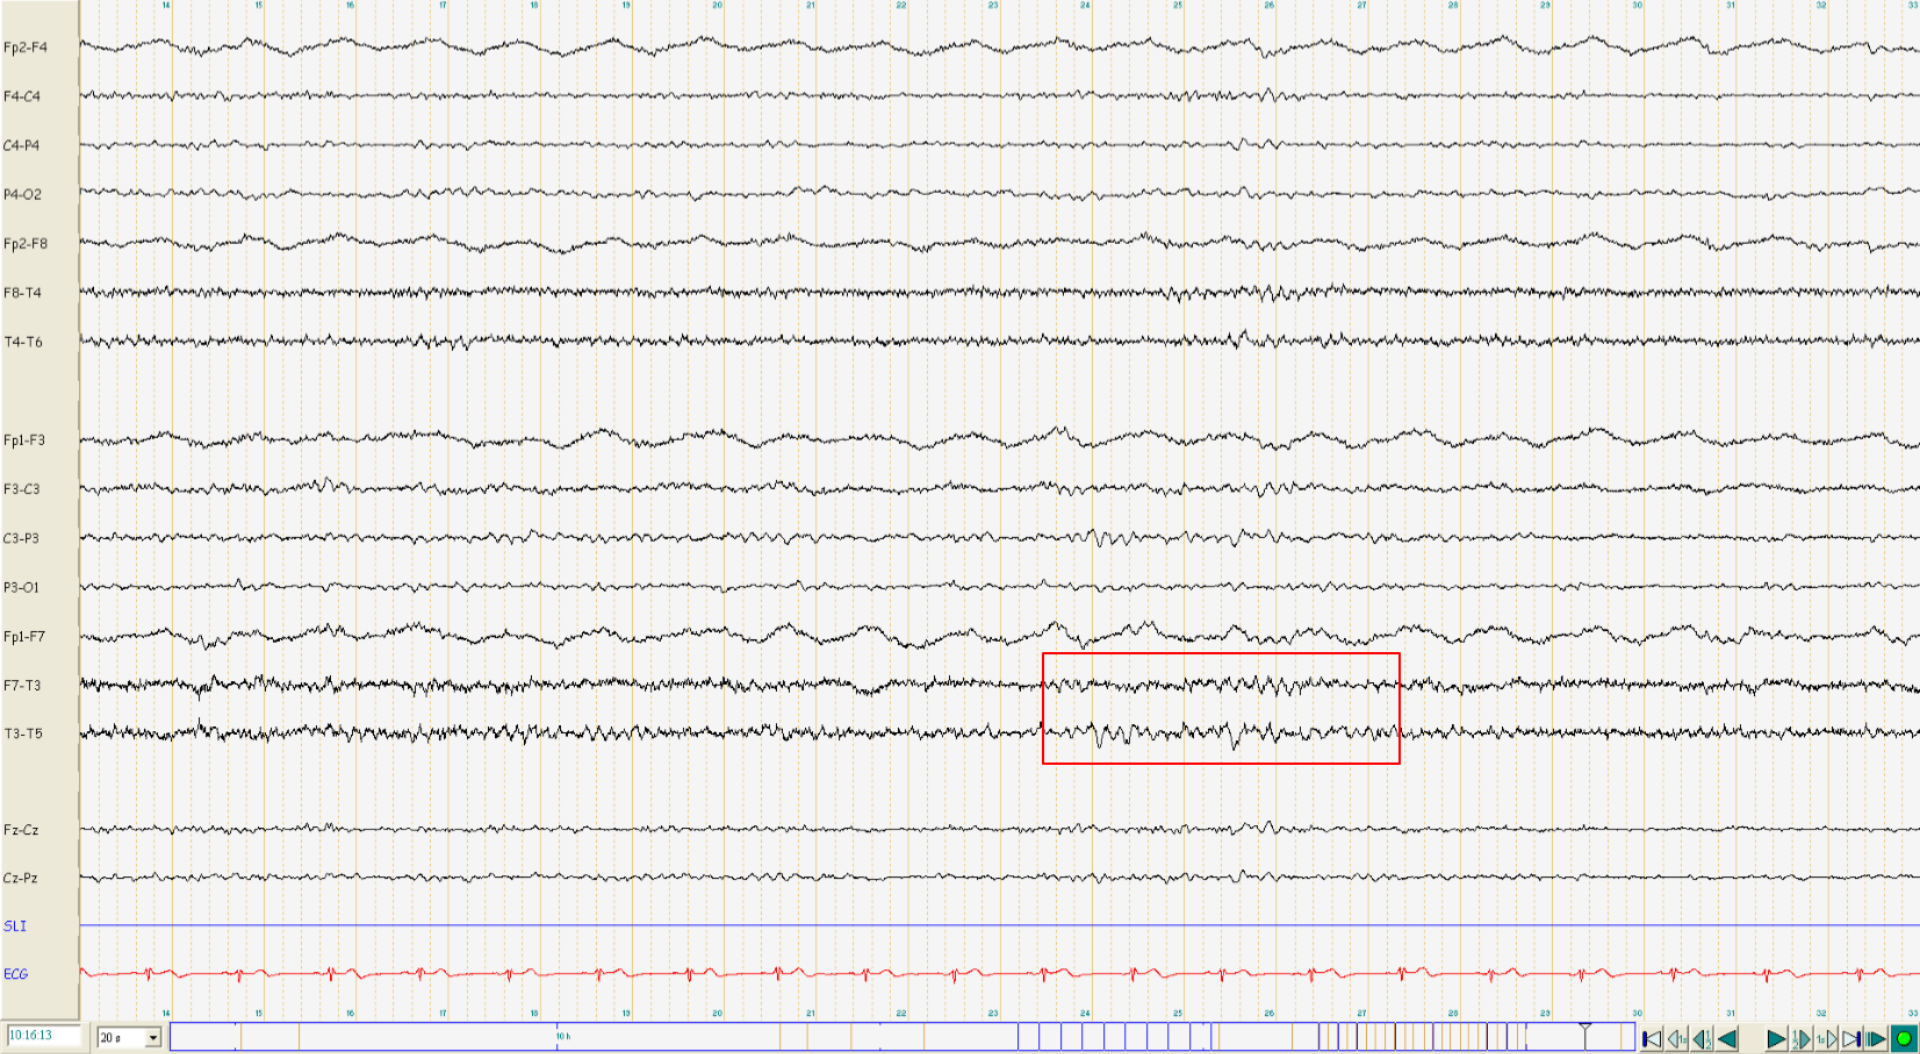

**Supplementary Figure 2:** Awake EEG performed at Time 2 (Remission). Minimal sharp and slow waves facing the left temporal electrodes (longitudinal bipolar montage; frontopolar regions are disrupted by sweat artifacts).
